# Supplementary material
Source: PubMed Central journal article supplement (PMC3868643)
Supplement: NIHMS474144-supplement-supplement.pdf [file NIHMS474144-supplement-supplement.pdf]

Supplementary information

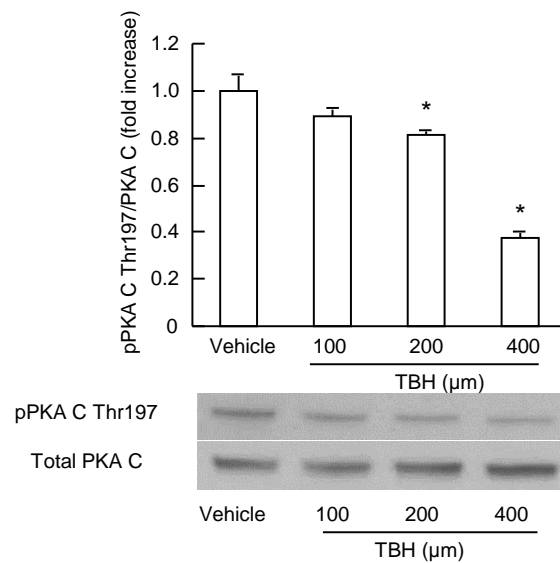

**Figure S1:** Effects of CypD deficiency on A $\beta$ -induced loss of surface GluR1 cluster.

Surface GluR1 clustering was assessed using nonpermeabilized staining conditions and an antibody recognizing an extracellular epitope of GluR1 (Abcam). Then neurons were fixed in 4% paraformaldehyde for 20 minutes and blocked in 10% goat serum and 0.2% Triton for 30 minutes. Neuronal dendrites were visualized by mouse anti-MAP2 IgG (Boehringer Mannheim) followed by goat anti-mouse IgG conjugated with FITC (Sigma–Aldrich Corp.). GluR1 staining was followed by goat anti-rabbit IgG conjugated with TRICT (Sigma–Aldrich Corp.). Images were taken under a Leica confocal. Post Synaptic density was quantified as the numbers of surface GluR1 positive clusters per micron of dendrite length. After A $\beta$  treatment, GluR1 cluster in nonTg neurons was decreased by 62% in comparison to those in vehicle-treated controls (Fig. S1), while CypD deficiency largely reversed the A $\beta$ -induced decrease in synaptic density (Fig. S1).

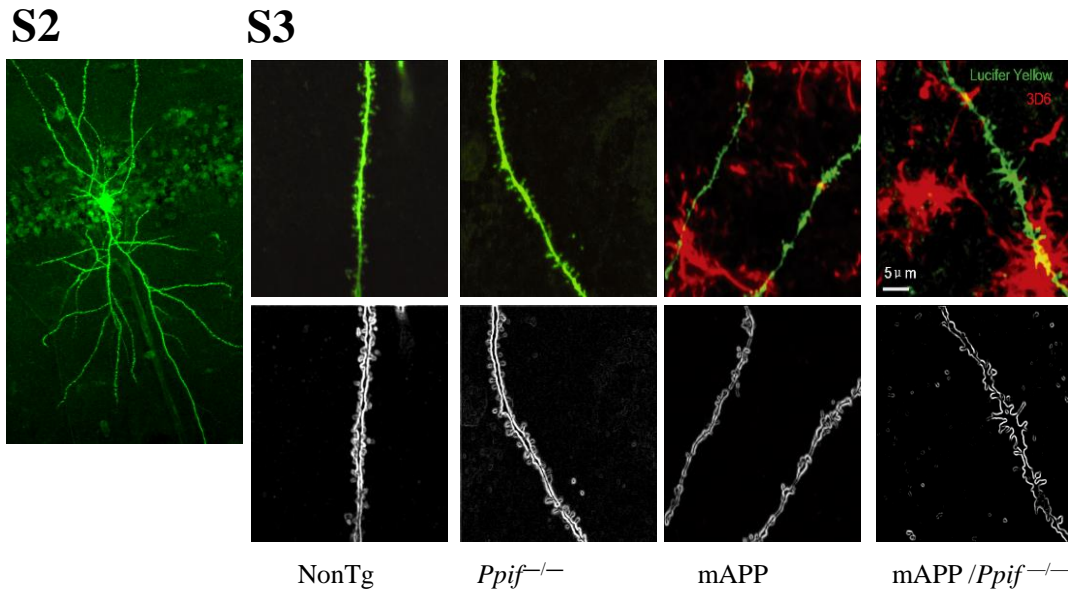

**Figure S2.** A representative image of a Lucifer yellow stained hippocampal CA1 neuron. Single neuron injection was performed on light fixed brain slices (-2 mm to bregma) as previously described with modification (1). CA1 neurons were filled with 0.1% Lucifer Yellow CH. After injection, brain slices were subjected to anti-Lucifer yellow IgG staining (Sigma) followed by goat anti-rabbit IgG Alexa 488 (Invitrogen). Images were collected under Biorad confocal microscopy.

**Figure S3.** Enlargements of representative images show CA1 basal dendritic spines and Aβ immunoreactive plaques. Lucifer Yellow stained CA1 neurons were double stained with 3D6 followed by goat anti-mouse IgG Alexa 594 (Invitrogen) to visualize the amyloid beta plaques. The double staining helps to determine the physical proximity of dendritic spines to amyloid beta plaques. Scale bar = 5μm.

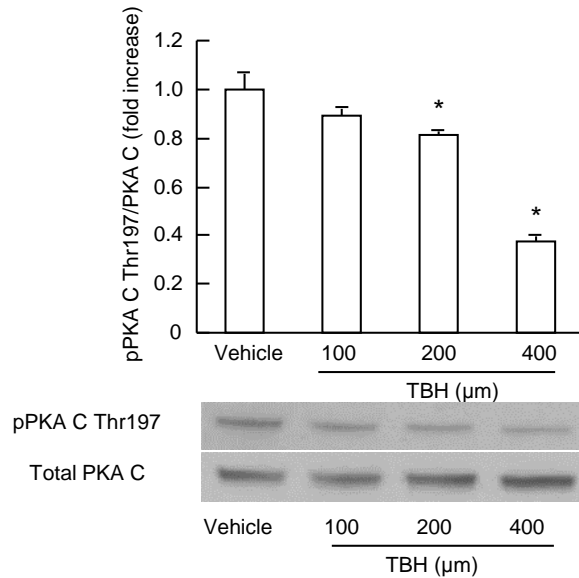

**Figure S4.** TBH-induced PKAc dephosphorylation in cultured nonTg neurons. We investigated the direct effect of oxidative stress on phosphorylated PKA C (p-PKA C) in neurons. NonTg hippocampal neurons were exposed to tert-butyl hydroperoxide (TBH) at concentrations of 0, 100, 200 and 400 μM for 1 hour, and then subjected to the immunoblotting for PKA C Thr197 phosphorylation. We selected TBH for this study as it is a strong inducer of mitochondrial ROS production, and triggers CypD translocation to mitochondrial inner membrane leading to mPTP formation (2, 3). Indeed, in the presence of TBH, PKA C underwent a dose-dependent decrease in its Thr197 phosphorylation, while there was no change in the levels of total PKA C expression. Levels of p-PKA C relative to the total PKA C demonstrated a substantial decrease ( $p < 0.05$ ). These results provide evidence that oxidative stress is a causative factor of PKA C dephosphorylation in neurons.

## References:

1. Pace CJ, Tieman DG, & Tieman SB (2002) Intracellular injection in fixed slices: obtaining complete dendritic arbors of large cells. (Translated from eng) *J Neurosci Methods* 119(1):23-30 (in eng).

Du et al.

2. Pias EK, *et al.* (2003) Differential effects of superoxide dismutase isoform expression on hydroperoxide-induced apoptosis in PC-12 cells. (Translated from eng) *J Biol Chem* 278(15):13294-13301 (in eng).
3. Connern CP & Halestrap AP (1996) Chaotropic agents and increased matrix volume enhance binding of mitochondrial cyclophilin to the inner mitochondrial membrane and sensitize the mitochondrial permeability transition to  $[Ca^{2+}]$ . (Translated from eng) *Biochemistry* 35(25):8172-8180 (in eng).
